# Supplementary material
Source: HighWire-hosted journal article supplement (http://ajnr-stage2.highwire.org/highwire/filestream/64083/field_highwire_adjunct_files/0/17-01236.pdf)
Supplement: 17-01236.pdf [file 17-01236.pdf]

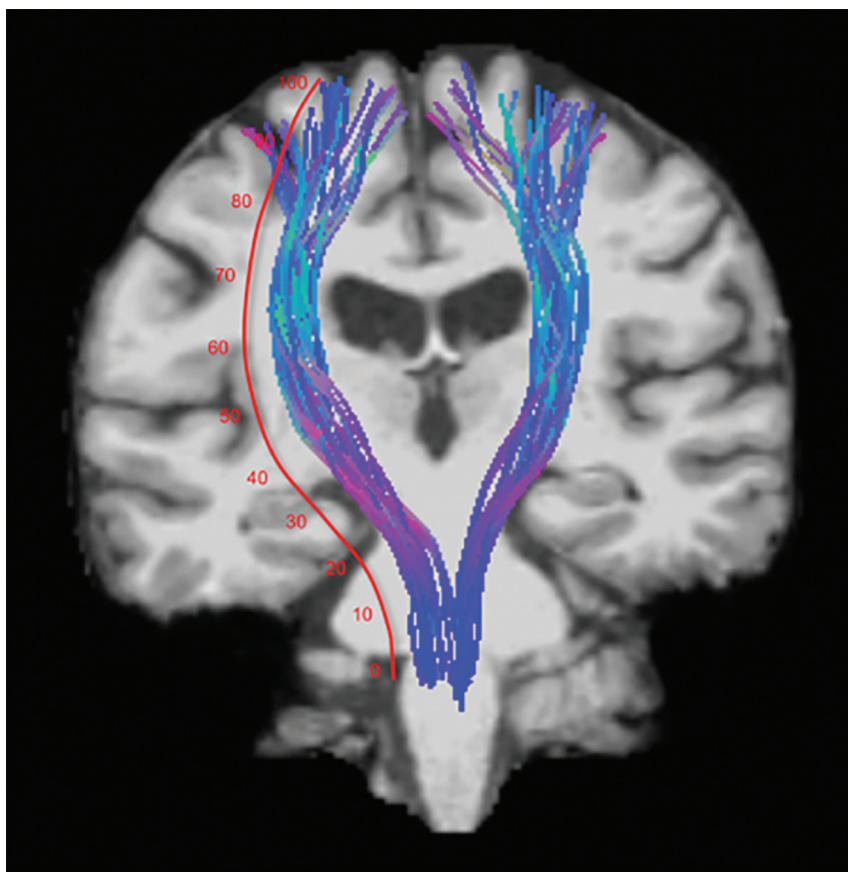

**ON-LINE FIGURE.** Demonstration of anatomy as a function of the percentage distance along the corticospinal tract. This image can be used as a reference so that readers can visualize the anatomy where group differences occur.
